# Supplementary material for: Certain Polymorphisms in SP110 Gene Confer Susceptibility to Tuberculosis: A Comprehensive Review and Updated Meta-Analysis
Source: PubMed Central journal article supplement — Yonsei Med J. 2016 Nov 7;58(1):165–73. doi: 10.3349/ymj.2017.58.1.165 (PMC5122633; doi:10.3349/ymj.2017.58.1.165), 2016-11-07
Supplement: ymj-58-165-s001.pdf [file ymj-58-165-s001.pdf]

**Supplementary Table 1.** Scale for Quality Assessment

|                                            | <b>Criteria</b>                                                                                                                            | <b>Score</b> |
|--------------------------------------------|--------------------------------------------------------------------------------------------------------------------------------------------|--------------|
| 1. Representativeness of cases             |                                                                                                                                            |              |
|                                            | Consecutively/randomly selected from case population with clearly defined sampling frame                                                   | 2            |
|                                            | Consecutively/randomly selected from case population without clearly defined sampling frame or with extensive inclusion/exclusion criteria | 1            |
|                                            | Not described                                                                                                                              | 0            |
| 2. Source of controls                      |                                                                                                                                            |              |
|                                            | Population-based or blood donors                                                                                                           | 2            |
|                                            | Hospital-based                                                                                                                             | 1            |
|                                            | Not described                                                                                                                              | 0            |
| 3. Diagnosis of tuberculosis cases         |                                                                                                                                            |              |
|                                            | Clinical and radiological diagnosis with the confirmation of sputum microscopy and culture                                                 | 2            |
|                                            | Clinical and radiological diagnosis without the confirmation of sputum microscopy and culture                                              | 1            |
|                                            | Not described                                                                                                                              | 0            |
| 4. Confirmation of controls                |                                                                                                                                            |              |
|                                            | Controls were tested to eliminate tuberculosis                                                                                             | 2            |
|                                            | Controls were subjects who did not report tuberculosis; no objective testing                                                               | 1            |
|                                            | Not described                                                                                                                              | 0            |
| 5. Test for Hardy-Weinberg equilibrium     |                                                                                                                                            |              |
|                                            | Hardy-Weinberg equilibrium in control group                                                                                                | 2            |
|                                            | Hardy-Weinberg disequilibrium in control group                                                                                             | 1            |
|                                            | Hardy-Weinberg equilibrium not checked                                                                                                     | 0            |
| 6. Ascertainment of genotyping examination |                                                                                                                                            |              |
|                                            | Genotyping done under "blind" conditions                                                                                                   | 1            |
|                                            | Not blinded or not mentioned                                                                                                               | 0            |
| 7. Association assessment                  |                                                                                                                                            |              |
|                                            | Assess association between genotypes and tuberculosis with appropriate statistics and adjustment for confounders                           | 2            |
|                                            | Assess association between genotypes and tuberculosis with appropriate statistics without adjustment for confounders                       | 1            |
|                                            | Inappropriate statistics used                                                                                                              | 0            |
| 8. Inclusion-exclusion criteria            |                                                                                                                                            |              |
|                                            | Described in cases and controls                                                                                                            | 2            |
|                                            | Only have inclusion criteria in case/control, exclusion not described                                                                      | 1            |
|                                            | Not mentioned                                                                                                                              | 0            |
| 9. Total sample size                       |                                                                                                                                            |              |
|                                            | ≥500                                                                                                                                       | 2            |
|                                            | >200 but <500                                                                                                                              | 1            |
|                                            | ≤200                                                                                                                                       | 0            |
