# Supplementary material for: Certain Polymorphisms in SP110 Gene Confer Susceptibility to Tuberculosis: A Comprehensive Review and Updated Meta-Analysis
Source: PubMed Central journal article supplement — Yonsei Med J. 2016 Nov 7;58(1):165–73. doi: 10.3349/ymj.2017.58.1.165 (PMC5122633; doi:10.3349/ymj.2017.58.1.165), 2016-11-07
Supplement: ymj-58-165-s002.pdf [file ymj-58-165-s002.pdf]

**Supplementary Table 2.** Quality Assessment Scores of Studies Selected to Evaluate the Association of SP110 Polymorphisms and the Risk of TB

| Author                           | Representativeness of cases | Source of controls | Diagnosis of TB cases | Confirmation of controls | Test for HWE | Ascertainment of genotyping examination | Association assessment | Inclusion-exclusion criteria | Total sample size | Total* |
|----------------------------------|-----------------------------|--------------------|-----------------------|--------------------------|--------------|-----------------------------------------|------------------------|------------------------------|-------------------|--------|
| Liang, et al. <sup>34</sup>      | 2                           | 2                  | 2                     | 2                        | 2            | 0                                       | 2                      | 2                            | 2                 | 16     |
| Abhimanyu, et al. <sup>12†</sup> | 2                           | 2                  | 2                     | 1                        | 2            | 0                                       | 2                      | 2                            | 0                 | 13     |
| Abhimanyu, et al. <sup>12</sup>  | 2                           | 2                  | 2                     | 1                        | 2            | 0                                       | 2                      | 1                            | 0                 | 12     |
| Cai, et al. <sup>18</sup>        | 2                           | 2                  | 2                     | 2                        | 2            | 0                                       | 2                      | 2                            | 2                 | 16     |
| Png, et al. <sup>20</sup>        | 2                           | 2                  | 2                     | 2                        | 2            | 0                                       | 2                      | 2                            | 2                 | 16     |
| Fox, et al. <sup>21†</sup>       | 2                           | 2                  | 2                     | 2                        | 2            | 0                                       | 2                      | 2                            | 2                 | 16     |
| Fox, et al. <sup>21</sup>        | 2                           | 2                  | 2                     | 2                        | 2            | 0                                       | 2                      | 1                            | 2                 | 15     |
| Babb, et al. <sup>35</sup>       | 2                           | 2                  | 2                     | 1                        | 2            | 0                                       | 1                      | 1                            | 2                 | 13     |
| Cong, et al. <sup>19</sup>       | 2                           | 2                  | 2                     | 1                        | 2            | 0                                       | 2                      | 2                            | 1                 | 14     |
| Szeszko, et al. <sup>33</sup>    | 2                           | 2                  | 2                     | 1                        | 2            | 0                                       | 1                      | 2                            | 2                 | 14     |
| Ying, et al. <sup>36</sup>       | 2                           | 2                  | 2                     | 2                        | 2            | 1                                       | 2                      | 2                            | 1                 | 16     |
| Thye, et al. <sup>32</sup>       | 2                           | 2                  | 2                     | 2                        | 2            | 0                                       | 2                      | 2                            | 2                 | 16     |
| Jiang, et al. <sup>22</sup>      | 2                           | 2                  | 2                     | 2                        | 2            | 0                                       | 2                      | 2                            | 2                 | 16     |

TB, tuberculosis; HWE, Hardy-Weinberg equilibrium; SP110, Speckled 110.

\*Quality scores ranged from 0 points (worst) to 17 points (best). Studies scoring less than 13 points were classified as low quality, and those scoring 13 points or higher were classified as high quality, †We treat the article as two independent studies on account of having data of two kinds of TB.
