# Supplementary material for: Certain Polymorphisms in SP110 Gene Confer Susceptibility to Tuberculosis: A Comprehensive Review and Updated Meta-Analysis
Source: PubMed Central journal article supplement — Yonsei Med J. 2016 Nov 7;58(1):165–73. doi: 10.3349/ymj.2017.58.1.165 (PMC5122633; doi:10.3349/ymj.2017.58.1.165), 2016-11-07
Supplement: ymj-58-165-s003.pdf [file ymj-58-165-s003.pdf]

**Supplementary Table 3.** Data Extraction of SNP Polymorphisms of SP110 (m/n: m represent the number of case; n represent the number of control)

| Author                           | rs1135791 |             |             |             |              | rs3948464   |             |               |               |              | rs1365766   |              |              |               |               | rs2114592    |             | rs6436915   |             |
|----------------------------------|-----------|-------------|-------------|-------------|--------------|-------------|-------------|---------------|---------------|--------------|-------------|--------------|--------------|---------------|---------------|--------------|-------------|-------------|-------------|
|                                  | CC        | CT          | TT          | C           | T            | TT          | TC          | CC            | C             | T            | GG          | GA           | AA           | G             | A             | C            | T           | G           | T           |
| Liang, et al. <sup>34</sup>      | 8/16      | 82/<br>229  | 217/<br>367 | 98/<br>261  | 516/<br>963  | -           | -           | -             | -             | -            | -           | -            | -            | -             | -             | -            | -           | -           | -           |
| Abhimanyu, et al. <sup>12†</sup> | -         | -           | -           | -           | -            | -           | -           | -             | 55/<br>35     | 129/<br>93   | -           | -            | -            | -             | -             | -            | -           | 73/<br>37   | 113/<br>87  |
| Abhimanyu, et al. <sup>12</sup>  | -         | -           | -           | 21/<br>52   | 35/86        | -           | -           | -             | -             | -            | -           | -            | -            | -             | -             | -            | -           | 15/<br>26   | 23/<br>116  |
| Cai, et al. <sup>18</sup>        | 13/<br>19 | 176/<br>125 | 513/<br>281 | 202/<br>163 | 1202/<br>687 | 1/1         | 72/<br>22   | 629/<br>402   | 1330/<br>826  | 74/<br>24    | 14/4        | 132/<br>64   | 556/<br>357  | 160/<br>72    | 1244/<br>778  | -            | -           | -           | -           |
| Png, et al. <sup>20</sup>        | 21/<br>15 | 119/<br>135 | 211/<br>211 | 161/<br>165 | 541/<br>557  | 347/<br>357 | 4/7         | 0/0           | 4/7           | 698/<br>721  | 14/<br>15   | 109/<br>109  | 225/<br>240  | 137/<br>139   | 559/<br>589   | 996/<br>1098 | 314/<br>346 | 411/<br>425 | 291/<br>295 |
| Fox, et al. <sup>21†</sup>       | -         | -           | -           | 210/<br>191 | 848/<br>941  | -           | -           | -             | 1051/<br>1124 | 1/8          | -           | -            | -            | 100/<br>113   | 958/<br>1019  | 847/<br>891  | 205/<br>241 | 647/<br>703 | 411/<br>429 |
| Fox, et al. <sup>21</sup>        | -         | -           | -           | 52/<br>191  | 210/<br>941  | -           | -           | -             | 266/<br>1124  | 0/8          | -           | -            | -            | 29/<br>113    | 233/<br>1019  | 210/<br>891  | 56/<br>241  | 157/<br>703 | 105/<br>429 |
| Babb, et al. <sup>35</sup>       | 35/<br>43 | 155/<br>170 | 191/<br>204 | 225/<br>256 | 537/<br>578  | 29/<br>35   | 142/<br>156 | 210/<br>226   | 562/<br>608   | 200/<br>226  | 14/<br>16   | 96/<br>109   | 271/<br>292  | 124/<br>141   | 638/<br>693   | 546/<br>599  | 216/<br>235 | -           | -           |
| Cong, et al. <sup>19</sup>       | 0/<br>0   | 45/<br>31   | 55/<br>75   | 45/<br>31   | 155/<br>181  | 0/0         | 9/32        | 91/<br>74     | 191/<br>180   | 9/32         | -           | -            | -            | -             | -             | -            | -           | -           | -           |
| Szeszko, et al. <sup>33</sup>    | -         | -           | -           | -           | -            | 24/<br>18   | 323/<br>371 | 1543/<br>1681 | 3409/<br>3733 | 371/<br>407  | 329/<br>333 | 877/<br>1006 | 696/<br>734  | 1535/<br>1672 | 2269/<br>2474 | -            | -           | -           | -           |
| Ying, et al. <sup>36</sup>       | 0/0       | 46/<br>30   | 152/<br>165 | 46/<br>30   | 350/<br>360  | -           | -           | -             | -             | -            | -           | -            | -            | -             | -             | -            | -           | -           | -           |
| Thye, et al. <sup>32</sup>       | -         | -           | -           | -           | -            | 227/<br>268 | 510/<br>632 | 314/<br>369   | 1138/<br>1370 | 964/<br>1168 | 12/<br>23   | 171/<br>263  | 872/<br>1123 | 195/<br>309   | 1915/<br>2509 | -            | -           | -           | -           |
| Jiang, et al. <sup>22</sup>      | 10/<br>19 | 115/<br>125 | 299/<br>280 | 135/<br>163 | 713/<br>685  | -           | -           | -             | -             | -            | -           | -            | -            | -             | -             | -            | -           | -           | -           |

  

| Author                           | rs11156887   |             |               |               |               | rs9061      |             |             |             |              | rs11679983 |             |               |             |               | rs1346311     |             | rs2114591     |              |
|----------------------------------|--------------|-------------|---------------|---------------|---------------|-------------|-------------|-------------|-------------|--------------|------------|-------------|---------------|-------------|---------------|---------------|-------------|---------------|--------------|
|                                  | TT           | TC          | CC            | T             | C             | AA          | AG          | GG          | A           | G            | AA         | AG          | GG            | A           | G             | C             | T           | C             | T            |
| Liang, et al. <sup>34</sup>      | 3/2          | 53/<br>69   | 250/<br>536   | 59/<br>73     | 553/<br>1141  | 13/2        | 105/<br>219 | 188/<br>384 | 131/<br>223 | 481/<br>987  | -          | -           | -             | -           | -             | -             | -           | -             | -            |
| Abhimanyu, et al. <sup>12†</sup> | -            | -           | -             | 151/<br>108   | 43/<br>30     | -           | -           | -           | 152/<br>109 | 42/<br>29    | -          | -           | -             | -           | -             | 184/<br>121   | 18/<br>15   | 15/9          | 177/<br>133  |
| Abhimanyu, et al. <sup>12</sup>  | -            | -           | -             | 13/<br>48     | 43/<br>88     | -           | -           | -           | 40/<br>109  | 12/<br>29    | -          | -           | -             | -           | -             | 55/121        | 1/15        | 33/<br>73     | 21/<br>61    |
| Cai, et al. <sup>18</sup>        | 12/3         | 124/<br>54  | 566/<br>368   | 148/<br>60    | 1256/<br>790  | 37/9        | 268/<br>139 | 397/<br>277 | 342/<br>157 | 1062/<br>693 | 1/1        | 40/<br>31   | 661/<br>393   | 42/<br>33   | 1362/<br>817  | -             | -           | -             | -            |
| Png, et al. <sup>20</sup>        | -            | -           | -             | -             | -             | 281/<br>284 | 67/<br>76   | 3/4         | 629/<br>644 | 73/<br>84    | 7/3        | 77/<br>84   | 267/<br>277   | 91/<br>90   | 611/<br>638   | -             | -           | 323/<br>324   | 379/<br>404  |
| Fox, et al. <sup>21†</sup>       | -            | -           | -             | 75/<br>91     | 977/<br>1041  | -           | -           | -           | -           | -            | -          | -           | -             | -           | -             | 967/<br>1039  | 91/<br>93   | -             | -            |
| Fox, et al. <sup>21</sup>        | -            | -           | -             | 23/<br>91     | 243/<br>1041  | -           | -           | -           | -           | -            | -          | -           | -             | -           | -             | 243/<br>1039  | 19/<br>93   | -             | -            |
| Cong, et al. <sup>19</sup>       | -            | -           | -             | -             | -             | 13/6        | 25/<br>30   | 62/<br>70   | 51/<br>42   | 149/<br>170  | 21/<br>44  | 56/<br>58   | 23/4          | 98/<br>146  | 102/<br>66    | -             | -           | -             | -            |
| Szeszko, et al. <sup>33</sup>    | 43/43        | 397/<br>490 | 1450/<br>1547 | 483/<br>576   | 3297/<br>3584 | -           | -           | -           | -           | -            | 52/<br>45  | 472/<br>554 | 1350/<br>1452 | 576/<br>644 | 3172/<br>3458 | 3259/<br>3634 | 525/<br>528 | -             | -            |
| Thye, et al. <sup>32</sup>       | 861/<br>1100 | 169/<br>258 | 11/<br>22     | 1891/<br>2458 | 191/<br>302   | -           | -           | -           | -           | -            | -          | -           | -             | -           | -             | 1577/<br>2007 | 391/<br>489 | 1094/<br>1235 | 926/<br>1051 |
| Jiang, et al. <sup>22</sup>      | -            | -           | -             | -             | -             | 15/9        | 171/<br>139 | 238/<br>276 | 201/<br>157 | 647/<br>691  | -          | -           | -             | -           | -             | -             | -           | -             | -            |

SNP, single nucleotide polymorphisms; SP110, Speckled 110; TB, tuberculosis.

†We treat the article as two independent studies on account of having data of two kinds of TB.
