# Supplementary material for: Certain Polymorphisms in SP110 Gene Confer Susceptibility to Tuberculosis: A Comprehensive Review and Updated Meta-Analysis
Source: PubMed Central journal article supplement — Yonsei Med J. 2016 Nov 7;58(1):165–73. doi: 10.3349/ymj.2017.58.1.165 (PMC5122633; doi:10.3349/ymj.2017.58.1.165), 2016-11-07
Supplement: ymj-58-165-s004.pdf [file ymj-58-165-s004.pdf]

**Supplementary Table 4.** Overall and Subgroup Analysis and Heterogeneity of Other Seven SP110 Gene Polymorphisms with the Risk of TB

| Variable     | n*    | Allelic model     |                    |         | Homozygote comparison |                    |         | Heterozygote comparison |                    |         | Dominant model    |                    |         | Recessive model   |                    |         |
|--------------|-------|-------------------|--------------------|---------|-----------------------|--------------------|---------|-------------------------|--------------------|---------|-------------------|--------------------|---------|-------------------|--------------------|---------|
|              |       | OR (95% CI)       | I <sup>2</sup> (%) | p value | OR (95% CI)           | I <sup>2</sup> (%) | p value | OR (95% CI)             | I <sup>2</sup> (%) | p value | OR (95% CI)       | I <sup>2</sup> (%) | p value | OR (95% CI)       | I <sup>2</sup> (%) | p value |
| rs1365776    |       | G vs. A           |                    |         | GG vs. AA             |                    |         | GA vs. AA               |                    |         | GG+GA vs. AA      |                    |         | GG vs. GA+AA      |                    |         |
| Overall      | 7 (5) | 0.99 (0.93, 1.06) | 36                 | 0.84    | 1.03 (0.87, 1.21)     | 0                  | 0.74    | 0.95 (0.86, 1.05)       | 34                 | 0.28    | 0.96 (0.88, 1.06) | 47                 | 0.42    | 0.93 (0.80, 1.09) | 0                  | 0.37    |
| High quality | 6 (4) | 1.00 (0.93, 1.07) | 46                 | 0.90    | 1.03 (0.87, 1.23)     | 9                  | 0.70    | 0.95 (0.86, 1.05)       | 50                 | 0.30    | 1.00 (0.84, 1.19) | 60                 | 0.98    | 0.93 (0.79, 1.08) | 2                  | 0.34    |
| Asian        | 4 (2) | 1.10 (0.95, 1.28) | 21                 | 0.19    | 1.32 (0.72, 2.42)     | 29                 | 0.37    | 1.19 (0.95, 1.49)       | 0                  | 0.14    | 1.21 (0.97, 1.50) | 27                 | 0.10    | 0.78 (0.43, 1.43) | 25                 | 0.43    |
| rs3948464    |       | T vs. C           |                    |         | TT vs. CC             |                    |         | TC vs. CC               |                    |         | TT+TC vs. CC      |                    |         | TT vs. TC+CC      |                    |         |
| Overall      | 9 (6) | 0.96 (0.78, 1.18) | 67                 | 0.70    | 1.02 (0.83, 1.24)     | 0                  | 0.08    | 0.94 (0.70, 1.27)       | 77                 | 0.70    | 0.96 (0.72, 1.27) | 77                 | 0.76    | 1.05 (0.88, 1.25) | 0                  | 0.57    |
| High quality | 7 (5) | 0.95 (0.70, 1.28) | 75                 | 0.74    | 1.04 (0.84, 1.29)     | 0                  | 0.73    | 0.92 (0.62, 1.35)       | 82                 | 0.66    | 0.94 (0.65, 1.36) | 81                 | 0.74    | 1.07 (0.89, 1.29) | 0                  | 0.45    |
| Asian        | 6 (3) | 0.71 (0.32, 1.59) | 80                 | 0.40    | 0.80 (0.16, 3.97)     | 0                  | 0.78    | 0.66 (0.10, 4.22)       | 91                 | 0.66    | 0.75 (0.13, 4.46) | 90                 | 0.75    | 1.38 (0.49, 3.90) | 0                  | 0.54    |
| Sample >500  | 7 (5) | 1.04 (0.88, 1.24) | 53                 | 0.62    | 1.02 (0.83, 1.24)     | 0                  | 0.86    | 1.05 (0.85, 1.30)       | 58                 | 0.63    | 1.05 (0.87, 1.27) | 53                 | 0.61    | 1.05 (0.88, 1.25) | 0                  | 0.57    |
| rs11679983   |       | A vs. G           |                    |         | AA vs. GG             |                    |         | AG vs. GG               |                    |         | AA+AG vs. GG      |                    |         | AA vs. AG+GG      |                    |         |
| Overall      | 4 (4) | 0.79 (0.56, 1.11) | 81                 | 0.17    | 0.63 (0.14, 2.89)     | 85                 | 0.55    | 0.78 (0.55, 1.10)       | 67                 | 0.16    | 0.75 (0.50, 1.12) | 77                 | 0.10    | 0.91 (0.37, 2.25) | 76                 | 0.84    |
| All in HWE   | 3 (3) | 0.97 (0.87, 1.09) | 0                  | 0.61    | 1.30 (0.89, 1.91)     | 0                  | 0.18    | 0.91 (0.80, 1.03)       | 0                  | 0.15    | 0.94 (0.83, 1.06) | 0                  | 0.29    | 1.33 (0.91, 1.95) | 0                  | 0.15    |
| Asian        | 3 (3) | 0.71 (0.41, 1.22) | 83                 | 0.22    | 0.47 (0.04, 5.44)     | 85                 | 0.55    | 0.62 (0.31, 1.21)       | 76                 | 0.16    | 0.56 (0.26, 1.24) | 84                 | 0.15    | 0.79 (0.19, 3.17) | 67                 | 0.74    |
| rs1346311    |       | T vs. C           |                    |         | NA                    |                    |         | NA                      |                    |         | NA                |                    |         | NA                |                    |         |
| Overall      | 6 (2) | 1.05 (0.96, 1.15) | 9                  | 0.33    | NA                    |                    |         | NA                      |                    |         | NA                |                    |         | NA                |                    |         |
| rs2114591    |       | T vs. C           |                    |         | NA                    |                    |         | NA                      |                    |         | NA                |                    |         | NA                |                    |         |
| Overall      | 4 (2) | 0.97 (0.88, 1.08) | 0                  | 0.58    | NA                    |                    |         | NA                      |                    |         | NA                |                    |         | NA                |                    |         |
| rs2114592    |       | T vs. C           |                    |         | NA                    |                    |         | NA                      |                    |         | NA                |                    |         | NA                |                    |         |
| Overall      | 4 (2) | 0.97 (0.87, 1.08) | 0                  | 0.6     | NA                    |                    |         | NA                      |                    |         | NA                |                    |         | NA                |                    |         |
| rs6436915    |       | T vs. G           |                    |         | NA                    |                    |         | NA                      |                    |         | NA                |                    |         | NA                |                    |         |
| Overall      | 4 (1) | 0.92 (0.74, 1.14) | 63                 | 0.44    | NA                    |                    |         | NA                      |                    |         | NA                |                    |         | NA                |                    |         |

OR, odds ratio; CI, confidence interval; I<sup>2</sup>, value of I<sup>2</sup> for heterogeneity test; p value, p value of the Z test for overall effect.; NA, not available without enough number of studies; TB, tuberculosis; HWE, Hardy-Weinberg equilibrium; SP110, Speckled 110.

\*Figure before the bracket is the number of studies for allele model; figure in the bracket is the number of studies for other four models.
