# Supplementary material for: Certain Polymorphisms in SP110 Gene Confer Susceptibility to Tuberculosis: A Comprehensive Review and Updated Meta-Analysis
Source: PubMed Central journal article supplement — Yonsei Med J. 2016 Nov 7;58(1):165–73. doi: 10.3349/ymj.2017.58.1.165 (PMC5122633; doi:10.3349/ymj.2017.58.1.165), 2016-11-07
Supplement: ymj-58-165-s005.pdf [file ymj-58-165-s005.pdf]

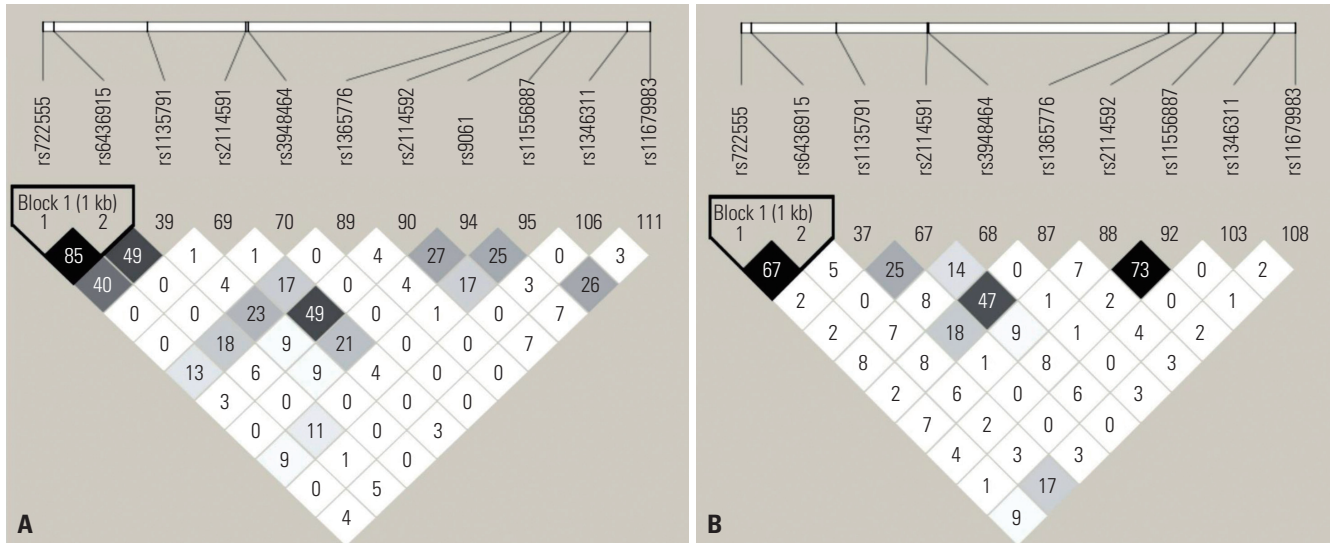

**Supplementary Fig. 1.** Linkage disequilibrium plots of SNPs of SP110 gene with tuberculosis in Chinese population (A) and European population (B).  $r^2$  values are displayed within each diamond. High  $r^2$  values are dark, and low  $r^2$  values are light. SNP, single nucleotide polymorphism.
